# Supplementary material for: Hydrogen bond network structures of protonated dimethylamine clusters H+(DMA)n (n = 3–7)
Source: Royal Society of Chemistry journal article supplement (doi:10.1039/d4cp01931h), 2024-01-01
Supplement: d4cp01931h1.pdf [file d4cp01931h1.pdf]

Electronic Supplementary Information for

## Hydrogen bond network structures of protonated dimethylamine clusters $\text{H}^+(\text{DMA})_n$ ( $n = 3 - 7$ )

Atsuya Mizuide and Asuka Fujii\*

*Department of Chemistry, Graduate School of Science, Tohoku University,  
Sendai 980-8578, Japan*

\*Corresponding author: [asuka.fujii.c5@tohoku.ac.jp](mailto:asuka.fujii.c5@tohoku.ac.jp)

### Contents

|                   |                                                                                                                                                                                           |
|-------------------|-------------------------------------------------------------------------------------------------------------------------------------------------------------------------------------------|
| <b>Table S1</b>   | Relative Gibbs free energies of the stable isomers shown in the main text                                                                                                                 |
| <b>Table S2</b>   | Calculated H-bonded NH stretching vibrational frequencies and H-bonding structure parameters of the stable isomers shown in the main text                                                 |
| <b>Table S3</b>   | Band frequencies in the experimental spectra of bare $\text{H}^+(\text{DMA})_n$ ( $n = 3 - 7$ )                                                                                           |
| <b>Table S4</b>   | Band frequencies in the experimental spectra of $\text{H}^+(\text{DMA})_n\text{-Ar}$ ( $n = 3 - 7$ )                                                                                      |
| <b>Figure S1</b>  | All calculated stable isomer structures of $\text{H}^+(\text{DMA})_3$                                                                                                                     |
| <b>Figure S2</b>  | All calculated stable isomer structures of $\text{H}^+(\text{DMA})_4$                                                                                                                     |
| <b>Figure S3</b>  | All calculated stable isomer structures of $\text{H}^+(\text{DMA})_5$                                                                                                                     |
| <b>Figure S4</b>  | All calculated stable isomer structures of $\text{H}^+(\text{DMA})_6$                                                                                                                     |
| <b>Figure S5</b>  | All calculated stable isomer structures of $\text{H}^+(\text{DMA})_7$                                                                                                                     |
| <b>Figure S6</b>  | Calculated IR spectra of the most stable <b>L</b> isomers at each temperature of $\text{H}^+(\text{DMA})_3$                                                                               |
| <b>Figure S7</b>  | Calculated IR spectra of the most stable <b>L</b> and <b>C</b> isomers at each temperature of $\text{H}^+(\text{DMA})_4$                                                                  |
| <b>Figure S8</b>  | Calculated IR spectra of the most stable <b>L</b> , <b>C</b> , and <b>Ct</b> isomers at each temperature of $\text{H}^+(\text{DMA})_5$                                                    |
| <b>Figure S9</b>  | Calculated IR spectra of the most stable <b>L</b> , <b>C</b> , and <b>Ct</b> isomers at each temperature of $\text{H}^+(\text{DMA})_6$                                                    |
| <b>Figure S10</b> | Calculated IR spectra of the most stable <b>L</b> , <b>C</b> , and <b>Ct</b> isomers at each temperature of $\text{H}^+(\text{DMA})_7$                                                    |
| <b>Figure S11</b> | Correlation plot between calculated H-bonded NH stretching vibrational frequencies and H-bonding structure parameters of the stable isomers of $\text{H}^+(\text{DMA})_n$ ( $n = 3 - 7$ ) |

**Table S1.** Relative Gibbs free energies of stable isomers of  $\text{H}^+(\text{DMA})_n$  ( $n = 4 - 7$ ) shown in the main text. Temperature is set to 0, 100, and 200 K. The level of theory is B3LYP+D3/6-311+G(d, p). All energies are in kJ/mol and zero-point energy corrected. The energies at 0 K are identical with the relative electronic energies. **L**, **C**, and **Ct** mean the structure types, linear, cyclic, and cyclic with a “tail”, respectively (see Fig. 1 in the main text). **Ct-A** is a **Ct** structure with a six-membered ring moiety, and **Ct-B** is with a five-membered ring moiety. Relative energy of  $n = 3$  is not shown here, since only **L** structures were found (see Fig. S1).

| relative free energy<br>(kJ/mol) |     |       |       |
|----------------------------------|-----|-------|-------|
|                                  | 0 K | 100 K | 200 K |
| <b><math>n = 4</math></b>        |     |       |       |
| <b>L</b>                         | 0   | 0     | 0     |
| <b>C</b>                         | 5.9 | 5.7   | 5.8   |
| <b><math>n = 5</math></b>        |     |       |       |
| <b>L</b>                         | 0.3 | 0     | 0     |
| <b>C</b>                         | 0   | 2.6   | 6.5   |
| <b>Ct</b>                        | 6.9 | 8.7   | 12.0  |
| <b><math>n = 6</math></b>        |     |       |       |
| <b>L</b>                         | 5.9 | 1.8   | 0     |
| <b>C</b>                         | 0   | 0     | 4.7   |
| <b>Ct</b>                        | 2.5 | 2.8   | 7.9   |
| <b><math>n = 7</math></b>        |     |       |       |
| <b>L</b>                         | 7.7 | 1.9   | 0     |
| <b>C</b>                         | 1.2 | 1.2   | 8.0   |
| <b>Ct-A</b>                      | 0   | 0     | 6.3   |
| <b>Ct-B</b>                      | 4.4 | 5.4   | 11.8  |

**Table S2.** Calculated H-bonded NH stretching vibrational frequencies and H-bonding structure parameters of the stable isomers of  $H^+(DMA)_n$ . The calculated H-bonded NH stretching frequencies, H-bond lengths (N $\cdots$ H distances), N-H bond lengths, and H-bond coordination status of the H-bonded (H-accepting) site of the most stable structures shown in Figs. 3-5, 7, and 8 in the main text are presented. Correlation between these NH frequency and these structure parameters is shown in Fig. S11.

|                     | Frequency (cm <sup>-1</sup> ) | H-bond length (Å) | N-H bond length (Å) | Bonded site |
|---------------------|-------------------------------|-------------------|---------------------|-------------|
| <b><i>n</i> = 3</b> |                               |                   |                     |             |
| L                   | 2508                          | 1.745             | 1.071               | A sym.      |
|                     | 2430                          | 1.740             | 1.071               | A asym.     |
| <b><i>n</i> = 4</b> |                               |                   |                     |             |
| L                   | 3031                          | 1.961             | 1.034               | A           |
|                     | 2591                          | 1.772             | 1.063               | A           |
|                     | 2021                          | 1.623             | 1.102               | AD          |
| C                   | 3255                          | 2.310             | 1.021               | AA sym.     |
|                     | 3212                          | 2.198             | 1.023               | AA asym.    |
|                     | 2525                          | 1.741             | 1.071               | AD sym.     |
|                     | 2366                          | 1.712             | 1.077               | AD asym.    |
| <b><i>n</i> = 5</b> |                               |                   |                     |             |
| L                   | 3059                          | 1.978             | 1.033               | A sym.      |
|                     | 3056                          | 1.977             | 1.033               | A asym.     |
|                     | 2291                          | 1.668             | 1.087               | AD sym.     |
|                     | 2159                          | 1.667             | 1.087               | AD asym.    |
| C                   | 3306                          | 2.381             | 1.017               | AA          |
|                     | 3181                          | 2.104             | 1.025               | AA          |
|                     | 3092                          | 2.007             | 1.031               | AD          |
|                     | 2434                          | 1.719             | 1.074               | AD sym.     |
|                     | 2170                          | 1.655             | 1.091               | AD asym.    |
| Ct                  | 3241                          | 2.218             | 1.022               | AAD         |
|                     | 3153                          | 2.086             | 1.027               | AAD         |
|                     | 3123                          | 2.027             | 1.028               | A           |
|                     | 2505                          | 1.737             | 1.071               | AD sym.     |
|                     | 2288                          | 1.687             | 1.083               | AD asym.    |
| <b><i>n</i> = 6</b> |                               |                   |                     |             |
| L                   | 3126                          | 2.009             | 1.028               | A           |
|                     | 3066                          | 1.980             | 1.032               | A           |
|                     | 2960                          | 1.912             | 1.039               | AD          |
|                     | 2305                          | 1.678             | 1.083               | AD sym.     |
|                     | 2108                          | 1.643             | 1.093               | AD asym.    |
| C                   | 3280                          | 2.274             | 1.019               | AA sym.     |
|                     | 3254                          | 2.202             | 1.020               | AA asym.    |
|                     | 3086                          | 2.016             | 1.031               | AD          |
|                     | 3039                          | 1.963             | 1.034               | AD          |
|                     | 2379                          | 1.707             | 1.078               | AD sym.     |
|                     | 2172                          | 1.657             | 1.090               | AD asym.    |
| Ct                  | 3298                          | 2.344             | 1.018               | AAD         |
|                     | 3136                          | 2.036             | 1.028               | A asym.     |
|                     | 3109                          | 2.044             | 1.029               | AAD sym.    |

|              |      |       |       |           |
|--------------|------|-------|-------|-----------|
|              | 3095 | 2.011 | 1.030 | AD        |
|              | 2358 | 1.689 | 1.081 | AD sym.   |
|              | 2216 | 1.672 | 1.085 | AD asym.  |
| <i>n = 7</i> |      |       |       |           |
| L            | 3130 | 2.012 | 1.028 | A         |
|              | 3124 | 2.014 | 1.028 | A         |
|              | 2977 | 1.923 | 1.037 | AD sym.   |
|              | 2973 | 1.920 | 1.038 | AD asym.  |
|              | 2265 | 1.661 | 1.088 | AD sym.   |
|              | 2125 | 1.653 | 1.090 | AD asym.  |
|              | C    | 3329  | 2.500 | 1.016     |
| 3213         |      | 2.102 | 1.022 | AA        |
| 3199         |      | 2.155 | 1.024 | AD        |
| 3063         |      | 1.973 | 1.032 | AD        |
| 3008         |      | 1.941 | 1.035 | AD        |
| 2330         |      | 1.683 | 1.083 | AD sym.   |
| 2181         |      | 1.660 | 1.087 | AD asym.  |
| Ct-A         |      | 3274  | 2.254 | 1.020     |
|              | 3210 | 2.140 | 1.023 | AAD asym. |
|              | 3161 | 2.079 | 1.026 | A         |
|              | 3077 | 2.011 | 1.031 | AD        |
|              | 3006 | 1.941 | 1.036 | AD        |
|              | 2382 | 1.707 | 1.078 | AD sym.   |
|              | 2130 | 1.645 | 1.093 | AD asym.  |
|              | Ct-B | 3314  | 2.409 | 1.017     |
| 3212         |      | 2.111 | 1.023 | A         |
| 3162         |      | 2.074 | 1.026 | AD        |
| 3122         |      | 2.079 | 1.029 | AAD       |
| 3079         |      | 2.004 | 1.031 | AD        |
| 2365         |      | 1.685 | 1.082 | AD sym.   |
| 2241         |      | 1.682 | 1.082 | AD asym.  |

**Table S3.** Band frequencies in the experimental spectra of bare  $\text{H}^+(\text{DMA})_n$  ( $n = 3 - 7$ ). All units are in  $\text{cm}^{-1}$ . The positions of shoulder bands are shown in parentheses.

| $n = 3$ | $n = 4$ | $n = 5$ | $n = 6$ | $n = 7$ | assignment          |
|---------|---------|---------|---------|---------|---------------------|
| 3331    | 3339    | -       | -       | -       | free NH str.        |
| -       | 3118    | 3160    | 3181    | 3227    | NH str. H-bonded to |
| -       | -       | -       | 3134    | 3136    | A or AD site        |
| (3013)  | 2979    | (3005)  | 2970    | 2967    |                     |
| (2988)  | 2950    | 2974    | 2944    | 2940    |                     |
| 2958    | 2927    | 2943    | (2921)  | 2871    |                     |
| (2917)  | 2889    | 2884    | 2876    | 2843    | CH str.             |
| (2890)  | 2810    | 2848    | 2845    | 2794    |                     |
| 2821    | -       | 2802    | 2798    | -       |                     |
| 2709    | -       | -       | -       | -       |                     |

**Table S4.** Band frequencies in the experimental spectra of bare  $\text{H}^+(\text{DMA})_n\text{-Ar}$  ( $n = 3 - 7$ ). All units are in  $\text{cm}^{-1}$ . The positions of shoulder bands are shown in parentheses.

| $n = 3$ | $n = 4$ | $n = 5$ | $n = 6$ | $n = 7$ | assignment            |
|---------|---------|---------|---------|---------|-----------------------|
| 3331    | 3339    | 3342    | -       | -       | free NH str.          |
| -       | -       | 3295    | 3305    | 3321    | NH str. H-bonded to   |
| -       | -       | 3241    | 3276    | 3296    | AA or AAD site        |
| -       | -       | -       | -       | 3286    |                       |
| -       | 3112    | 3143    | 3143    | 3229    | NH str. H-bonded to   |
| -       | -       | -       | -       | 3134    | A or AD site          |
| 3010    | 2981    | 3002    | 3004    | 3003    |                       |
| 2987    | 2951    | 2976    | 2974    | (2971)  |                       |
| 2958    | (2903)  | 2947    | 2945    | 2941    |                       |
| 2893    | 2884    | 2925    | 2870    | 2868    | CH str.               |
| 2813    | 2845    | 2900    | 2841    | 2839    |                       |
| 2706    | 2812    | 2882    | 2797    | 2794    |                       |
| -       | 2802    | 2846    | -       | -       |                       |
| -       | -       | 2801    | -       | -       |                       |
| 3120    | -       | -       | -       | -       | Combination/overtone? |

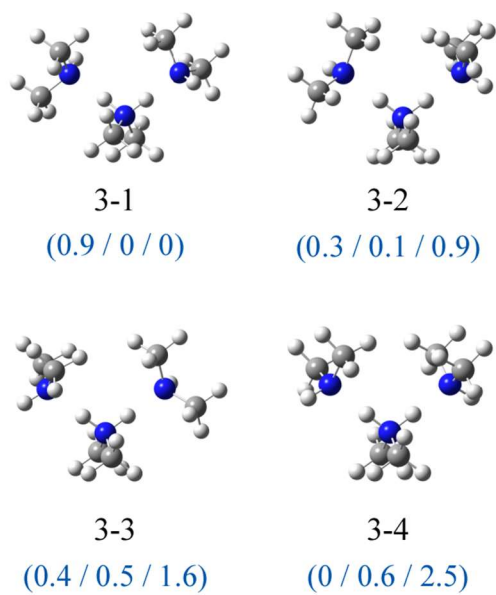

**Figure S1** All the calculated stable isomer structures of  $\text{H}^+(\text{DMA})_3$ . Only the **L** type structures were found. The relative free energies at 0/100/200 K are shown in parentheses (all units are in kJ/mol). The level of theory is B3LYP+D3/6-311+G(d, p).

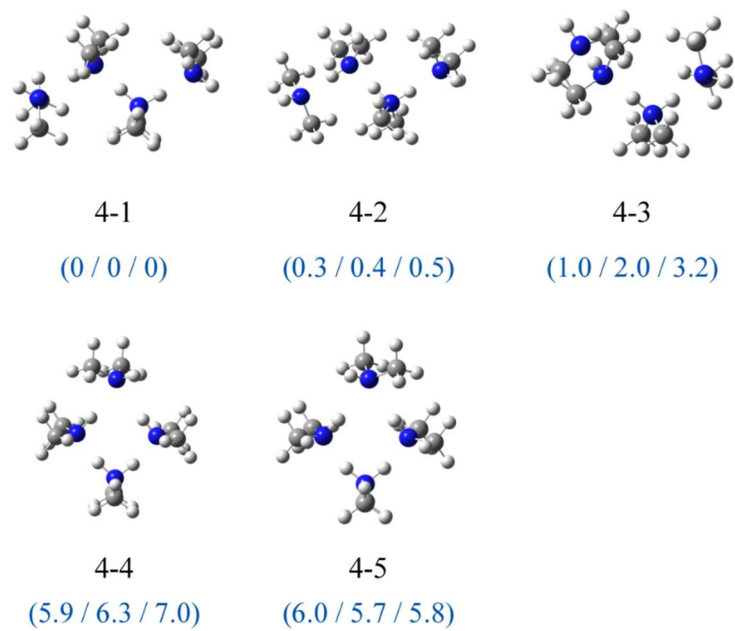

**Figure S2** All the calculated stable isomer structures of  $\text{H}^+(\text{DMA})_4$ . The L and C type structures were found. The relative energies at 0/100/200 K are shown in parentheses (all units are in kJ/mol). The level of theory is B3LYP+D3/6-311+G(d, p).

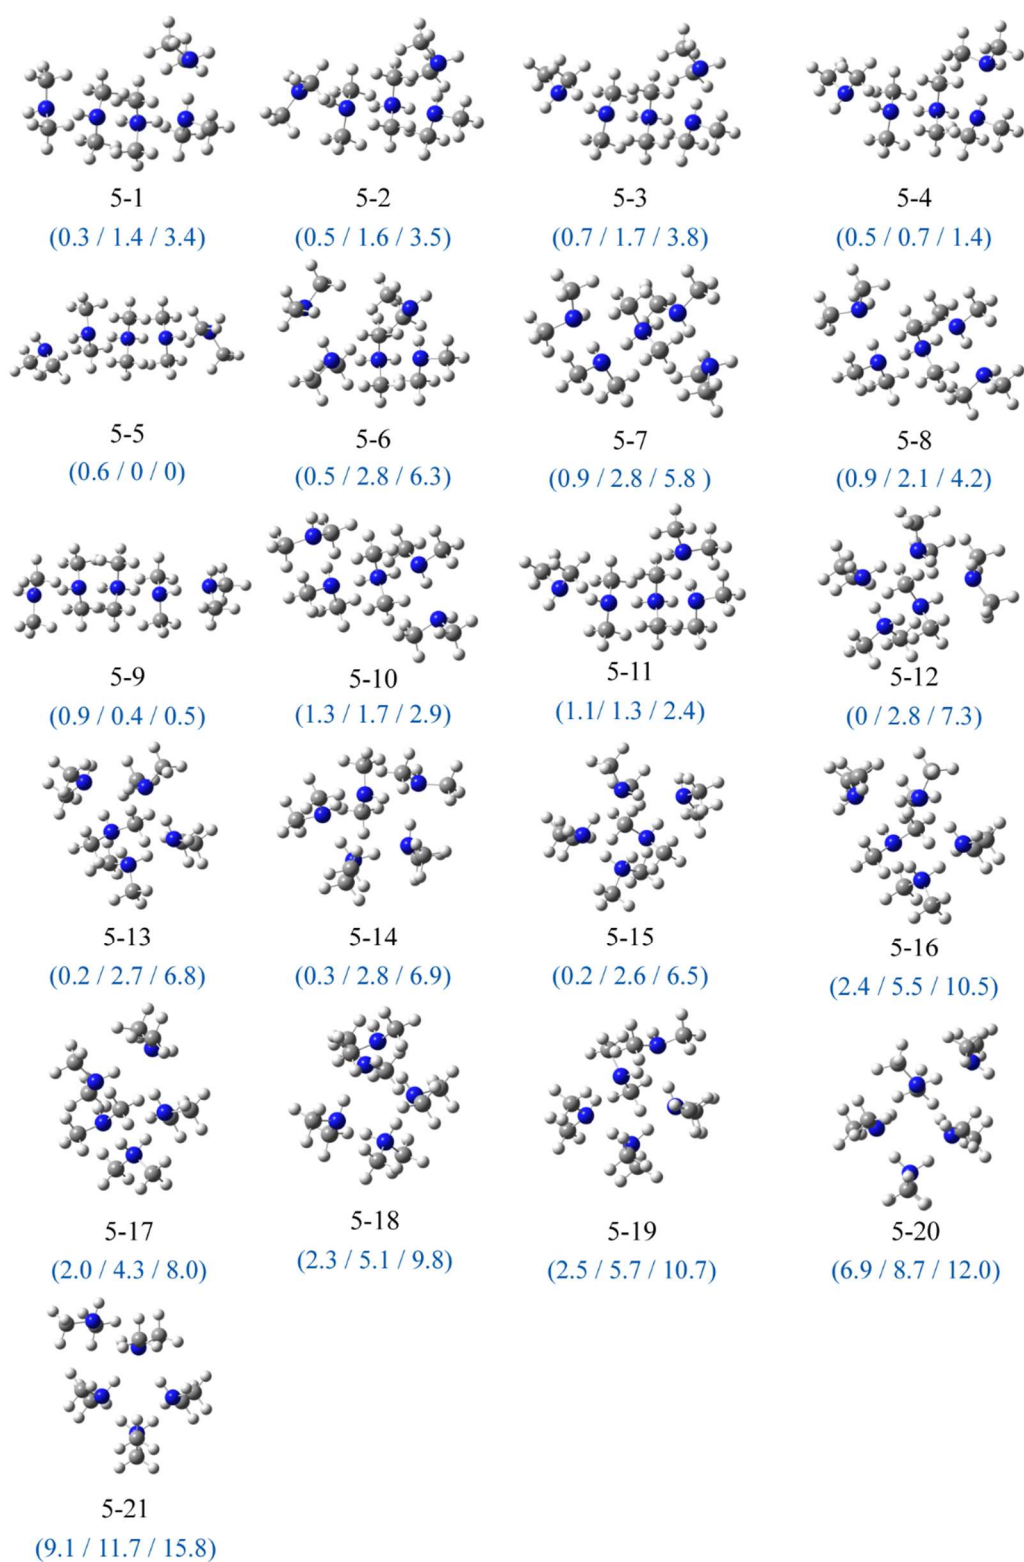

**Figure S3** All the calculated stable isomer structures of  $\text{H}^+(\text{DMA})_5$ . The L, C, and Ct type structures were found. The relative free energies at 0/100/200 K are shown in parentheses (all units are in kJ/mol). The level of theory is B3LYP+D3/6-311+G(d, p).



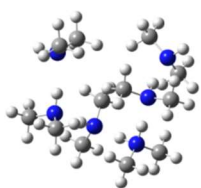

6-1  
(5.9 / 4.7 / 7.4)

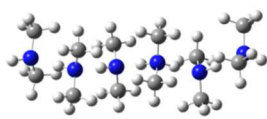

6-2  
(6.5 / 2.0 / 0.4)

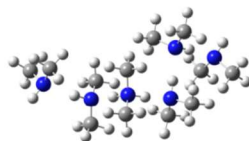

6-3  
(6.6 / 2.9 / 2.3)

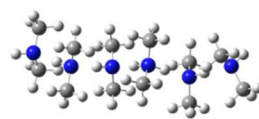

6-4  
(6.7 / 1.8 / 0)

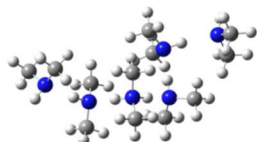

6-5  
(7.1 / 4.0 / 4.2)

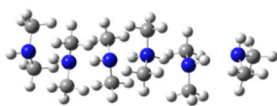

6-6  
(7.4 / 3.1 / 1.9)

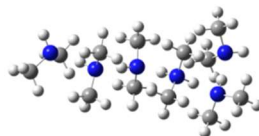

6-7  
(7.7 / 4.3 / 4.4)

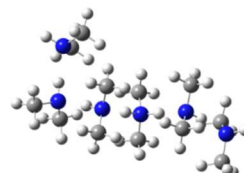

6-8  
(8.0 / 2.9 / 0.6)

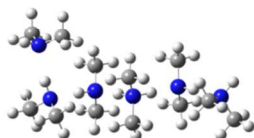

6-9  
(8.0 / 3.2 / 1.3)

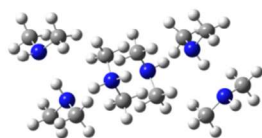

6-10  
(8.3 / 4.3 / 3.3)

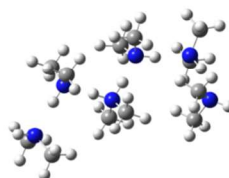

6-11  
(11.0 / 8.3 / 9.4)

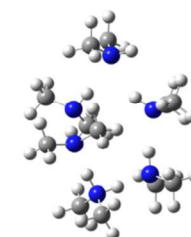

6-12  
(0 / 0 / 4.7)

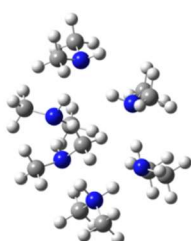

6-13  
(0.2 / 0.8 / 6.2)

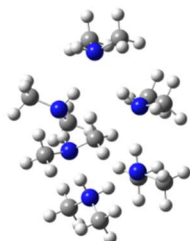

6-14  
(1.5 / 2.3 / 8.3)

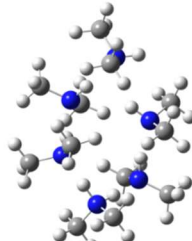

6-15  
(2.0 / 1.3 / 5.0)

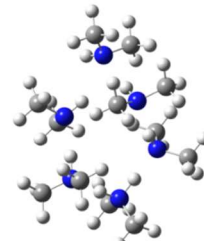

6-16  
(2.2 / 1.8 / 5.8)

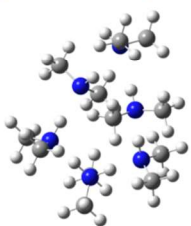

6-17  
(2.4 / 1.7 / 5.6)

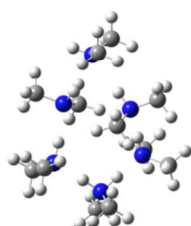

6-18  
(3.0 / 2.9 / 7.4)

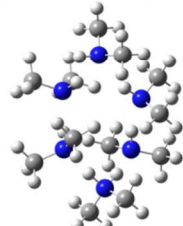

6-19  
(4.2 / 4.2 / 9.1)

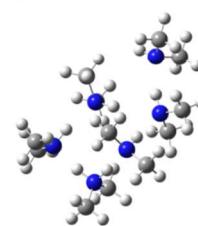

6-20  
(2.5 / 2.8 / 7.9)

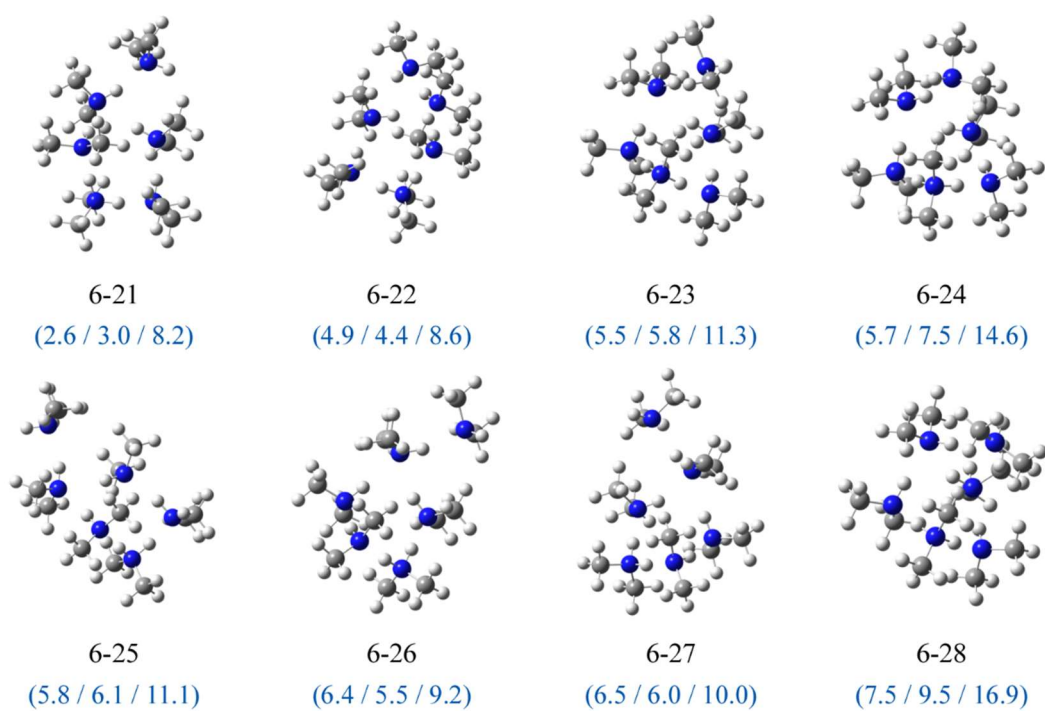

**Figure S4** All the calculated stable isomer structures of  $\text{H}^+(\text{DMA})_6$ . The L, C, and Ct type structures were found. The relative free energies at 0/100/200 K are shown in parentheses (all units are in kJ/mol). The level of theory is B3LYP+D3/6-311+G(d, p).

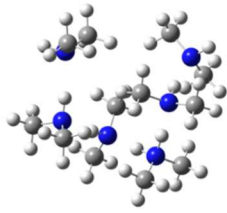

7-1  
(7.7 / 6.7 / 12.0)

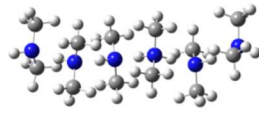

7-2  
(8.0 / 1.9 / 0.4)

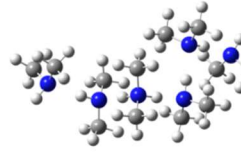

7-3  
(8.3 / 7.2 / 12.4)

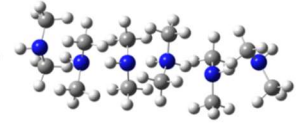

7-4  
(8.6 / 2.8 / 1.8)

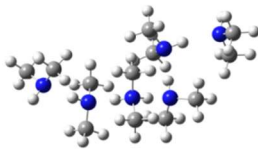

7-5  
(8.7 / 4.3 / 4.9)

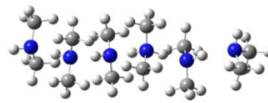

7-6  
(9.3 / 2.4 / 0)

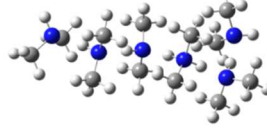

7-7  
(9.3 / 4.6 / 4.9)

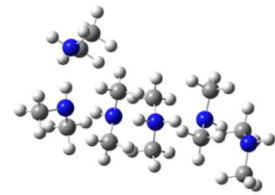

7-8  
(11.0 / 5.6 / 5.0)

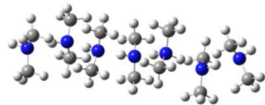

7-9  
(11.1 / 4.4 / 2.3)

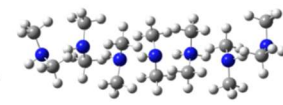

7-10  
(11.5 / 4.1 / 1.1)

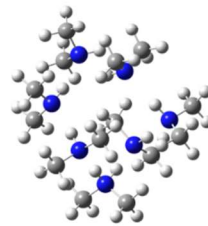

7-11  
(1.4 / 1.2 / 8.0)

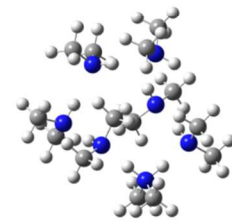

7-12  
(1.2 / 1.6 / 9.0)

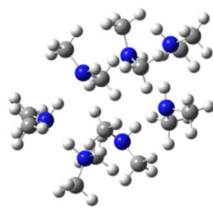

7-13  
(1.9 / 2.4 / 10.0)

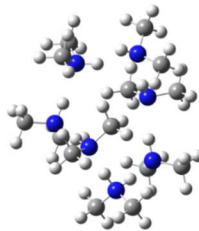

7-14  
(2.9 / 2.8 / 9.6)

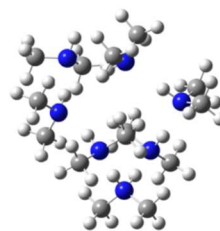

7-15  
(3.1 / 3.0 / 9.7)

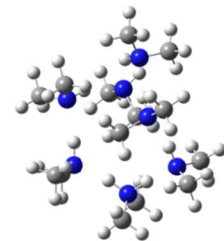

7-16  
(7.5 / 9.0 / 18.2)

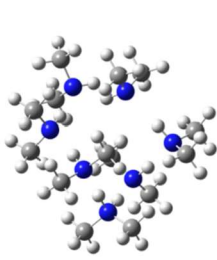

7-17  
(1.6 / 1.5 / 8.4)

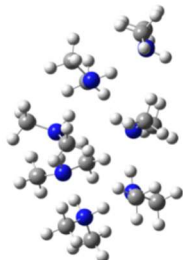

7-18  
(0 / 0 / 6.9)

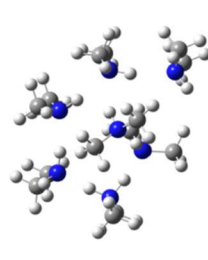

7-19  
(1.0 / 2.4 / 11.3)

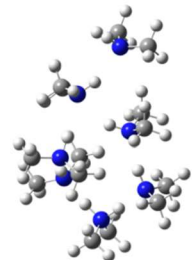

7-20  
(1.7 / 0.7 / 6.3)

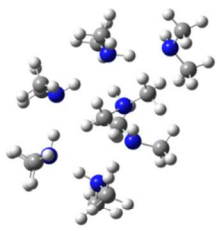

7-21  
(1.8 / 1.9 / 9.2)

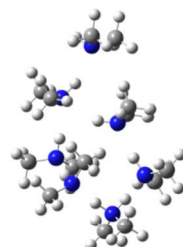

7-22  
(2.0 / 1.4 / 7.5)

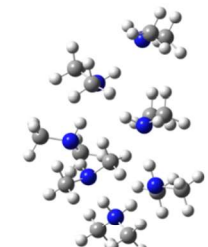

7-23  
(2.1 / 1.6 / 7.9)

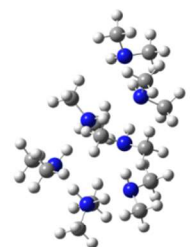

7-24  
(2.9 / 1.6 / 7.0)

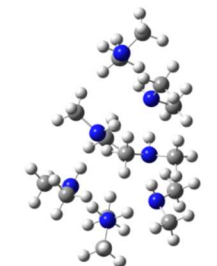

7-25  
(4.2 / 3.1 / 8.7)

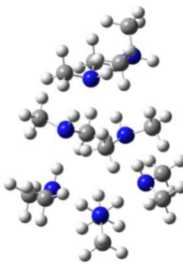

7-26  
(4.4 / 2.9 / 8.3)

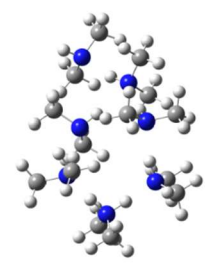

7-27  
(4.3 / 3.2 / 8.9)

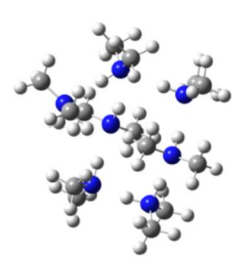

7-28  
(5.6 / 7.2 / 16.6)

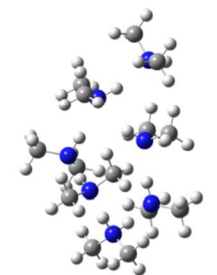

7-29  
(0.8 / 0.3 / 6.7)

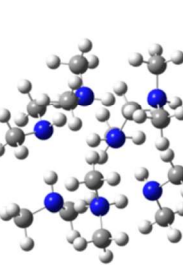

7-30  
(4.4 / 5.4 / 13.9)

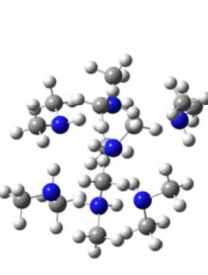

7-31  
(5.4 / 6.9 / 16.1)

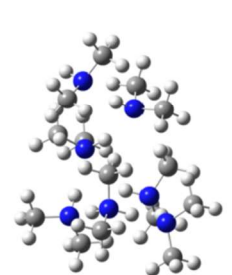

7-32  
(5.8 / 6.5 / 14.5)

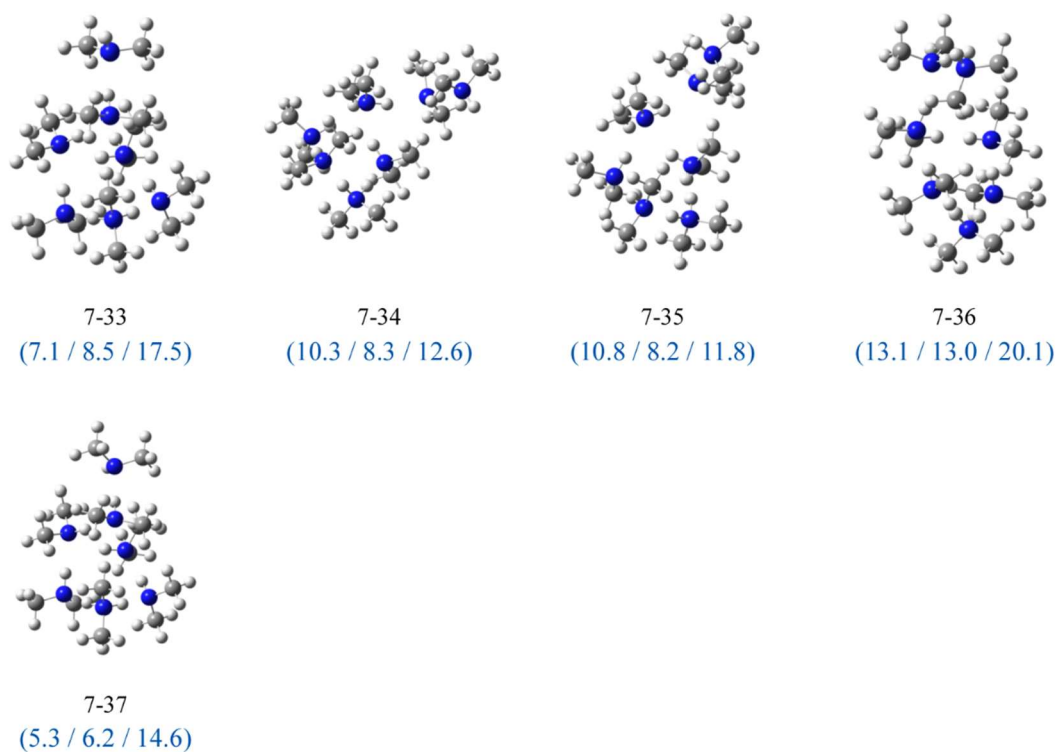

**Figure S5** All the calculated stable isomer structures of  $\text{H}^+(\text{DMA})_7$ . The L, C, and Ct type structures were found. The relative free energies at 0/100/200 K are shown in parentheses (all units are in kJ/mol). The level of theory is B3LYP+D3/6-311+G(d, p).

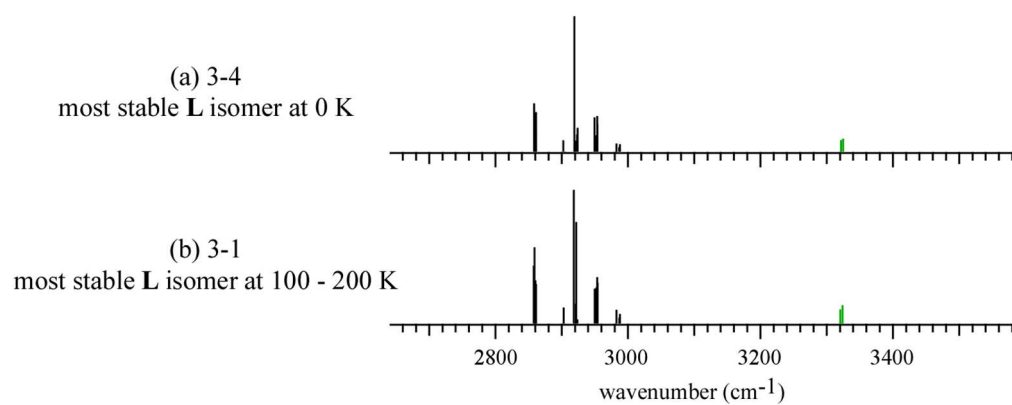

**Figure S6** Calculated IR spectra of the most stable **L** isomers of  $\text{H}^+(\text{DMA})_3$  at (a) 0 and (b) 100 - 200 K. The isomer structures are displayed in Fig. S1. Isomer 3-1 is that shown in Fig. 3 in the main text. The green- and black-colored bars are the free NH stretching and CH stretching vibrational bands, respectively.

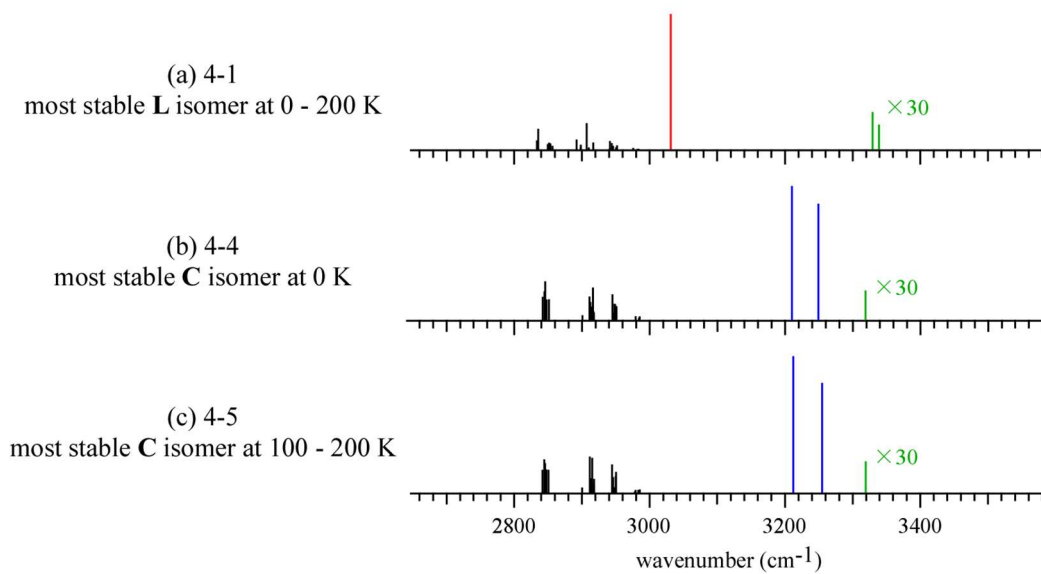

**Figure S7** Calculated IR spectra of the most stable **L** and **C** isomers of  $\text{H}^+(\text{DMA})_4$  at 0, 100, and 200 K. The isomer structures are displayed in Fig. S2. Isomers 4-1 and 4-5 are those shown in Fig. 4 in the main text. The green-, blue-, red-, and black-colored bars are the free NH stretching, NH stretching H-bonded to AA site, NH stretching H-bonded to A site, and CH stretching vibrational bands, respectively.

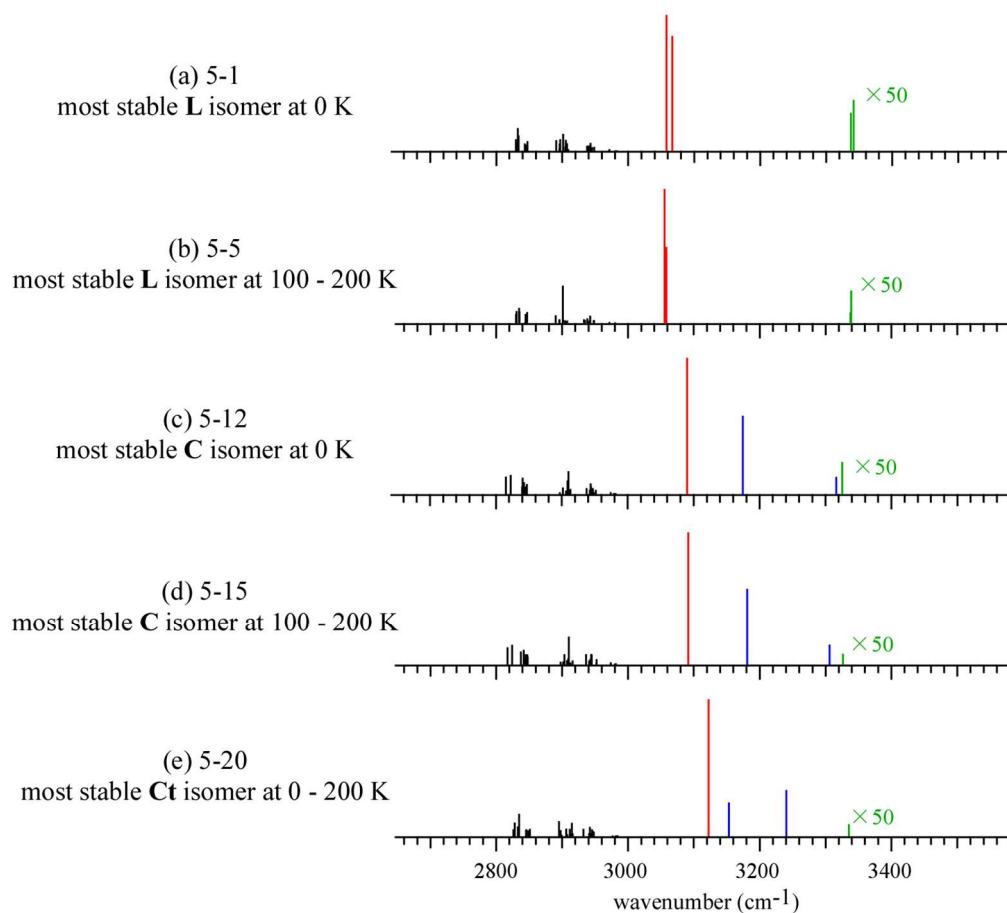

**Figure S8** Calculated IR spectra of the most stable **L**, **C**, and **Ct** isomers of  $\text{H}^+(\text{DMA})_5$  at 0, 100, and 200 K. The isomer structures are displayed in Fig. S3. Isomers 5-5, 5-15, and 5-20 are those shown in Fig. 5 in the main text. The green-, blue-, red-, and black-colored bars are the free NH stretching, H-bonded NH stretching to AA sites, H-bonded NH stretching to A or AD sites, and CH stretching vibrational bands, respectively.



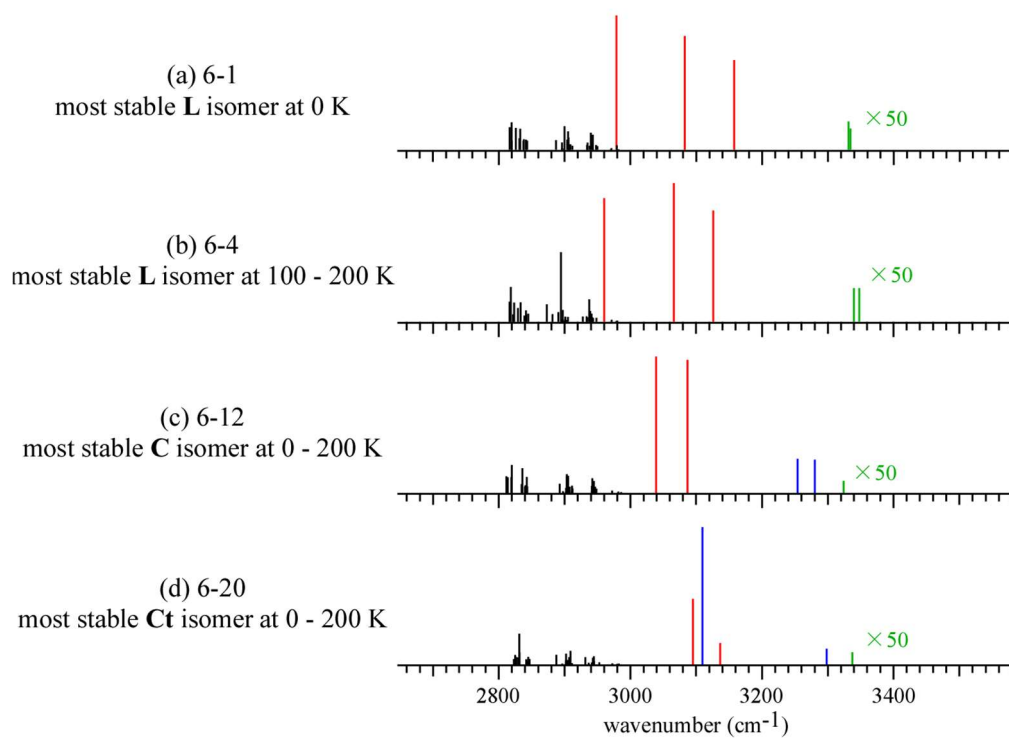

**Figure S9** Calculated IR spectra of the most stable L, C, and Ct isomers of H<sup>+</sup>(DMA)<sub>6</sub> at 0, 100, and 200 K. The isomer structures are displayed in Fig. S4. Isomers 6-4, 6-12, and 6-20 are those shown in Fig. 7 in the main text. The green-, blue-, red-, and black-colored bars are the free NH stretching, NH stretching H-bonded to AA sites, NH stretching H-bonded to A or AD sites, and CH stretching vibrational bands, respectively.

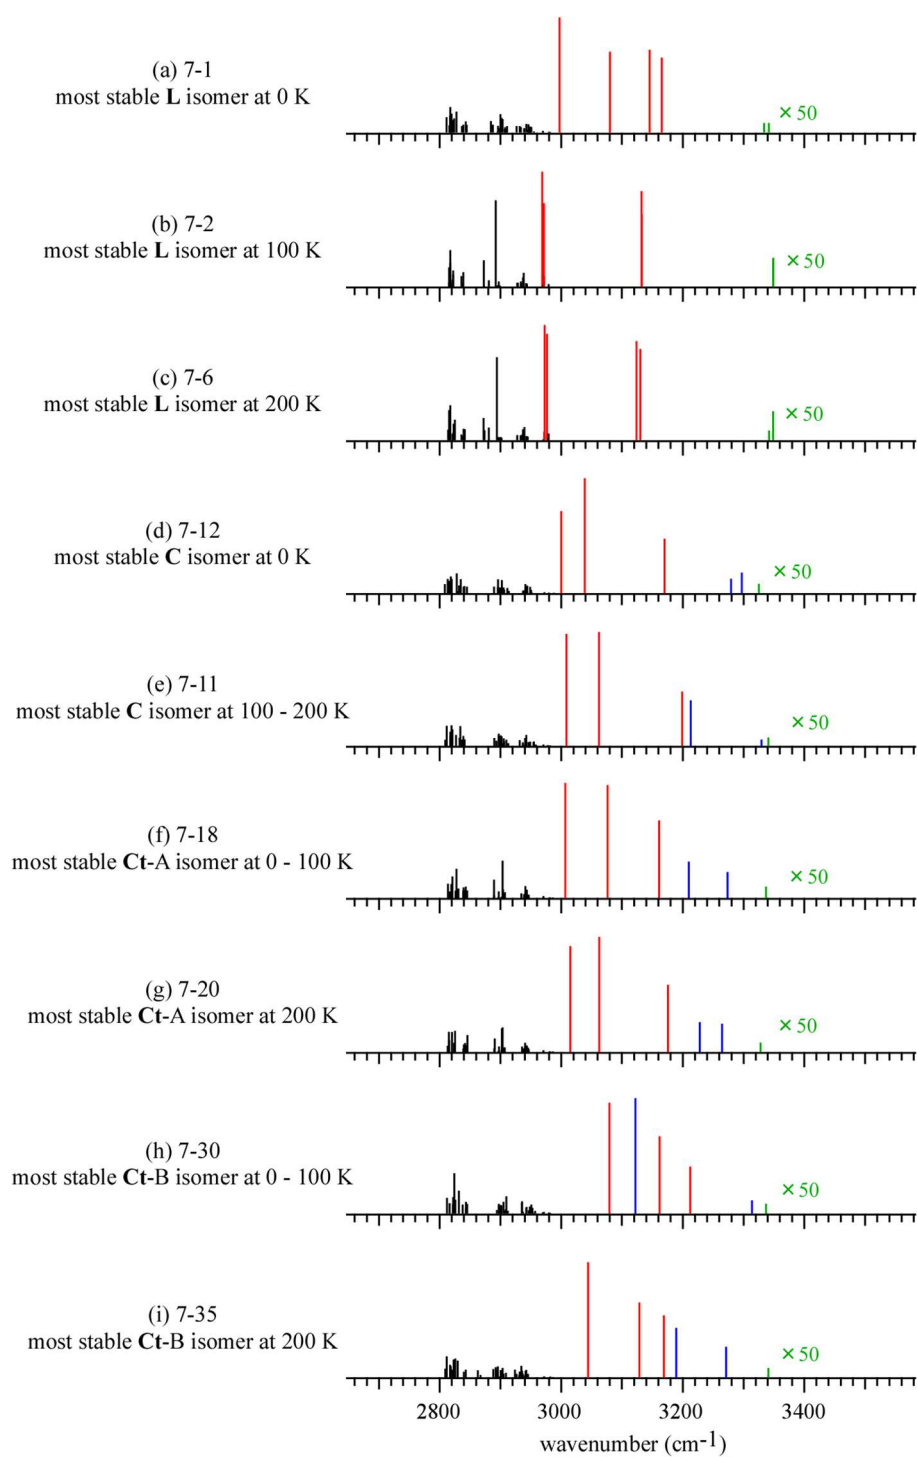

**Figure S10** Calculated IR spectra of the most stable L, C, Ct-A and Ct-B isomers of  $\text{H}^+(\text{DMA})_7$  at 0, 100, and 200 K. The isomer structures are displayed in Fig. S5. Isomers 7-6, 7-11, 7-18, and 7-30 are those shown in Fig. 8 in the main text. The green-, blue-, red-, and black-colored bars are the free NH stretching, NH stretching H-bonded to AA or AAD sites, NH stretching H-bonded to A or AD sites, and CH stretching vibrational bands, respectively.

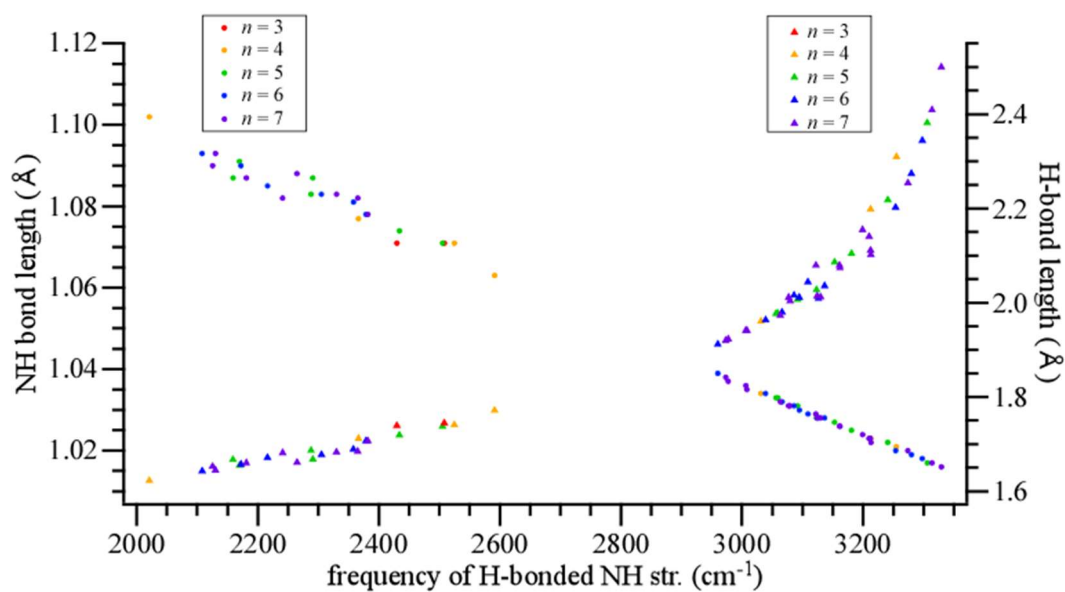

**Figure S11.** Correlation plot of the calculated H-bonding parameters of the stable structures of  $H^+(DMA)_n$  ( $n = 3 - 7$ ) with the H-bonded NH stretching vibrational frequencies. This plot is based on the data listed in Table S2. Correlation of the H-bonded NH stretching vibrational frequency with the N-H bond length is represented by circle (●), while that with the H-bond length (N $\cdots$ H distance) is represented by triangle (▲). It is clear that the H-bonded NH stretching vibrational frequency is correlated to both the N-H bond length and H-bond length.
